# Supplementary material for: A facile one-step method to synthesize SiO2@polydopamine core–shell nanospheres for shear thickening fluid
Source: Royal Society of Chemistry journal article supplement (doi:10.1039/c5ra25759j), 2016-01-01
Supplement: c5ra25759j1.pdf [file c5ra25759j1.pdf]

## Supporting information

### A Facile One-step Method to Synthesize SiO<sub>2</sub>@Polydopamine Core-shell Nanospheres for Shear Thickening Fluid

*Mei Liu<sup>a</sup>, Wanquan Jiang<sup>a,\*</sup>, Qian Chen<sup>b</sup>, Sheng Wang<sup>a</sup>, Ya Mao<sup>a</sup>, Xinglong Gong<sup>b,\*</sup>,  
Ken Cham-Fai Leung<sup>c</sup>, Jie Tian<sup>d</sup>, Huijuan Wang<sup>d</sup>, Shouhu Xuan<sup>b,\*</sup>*

*<sup>a</sup>Department of Chemistry, Collaborative Innovation Center of Suzhou Nano Science and Technology, University of Science and Technology of China (USTC), Hefei 230026, PR China*

*<sup>b</sup>CAS Key Laboratory of Mechanical Behavior and Design of Materials, Department of Modern Mechanics, USTC, Hefei 230027, PR China*

*<sup>c</sup>Department of Chemistry and Institute of Creativity, Hong Kong Baptist University, Kowloon, Hong Kong SAR, P. R. China.*

*<sup>d</sup>Engineering and Materials · Science · Experiment Center, USTC, Hefei 230027, PR China*

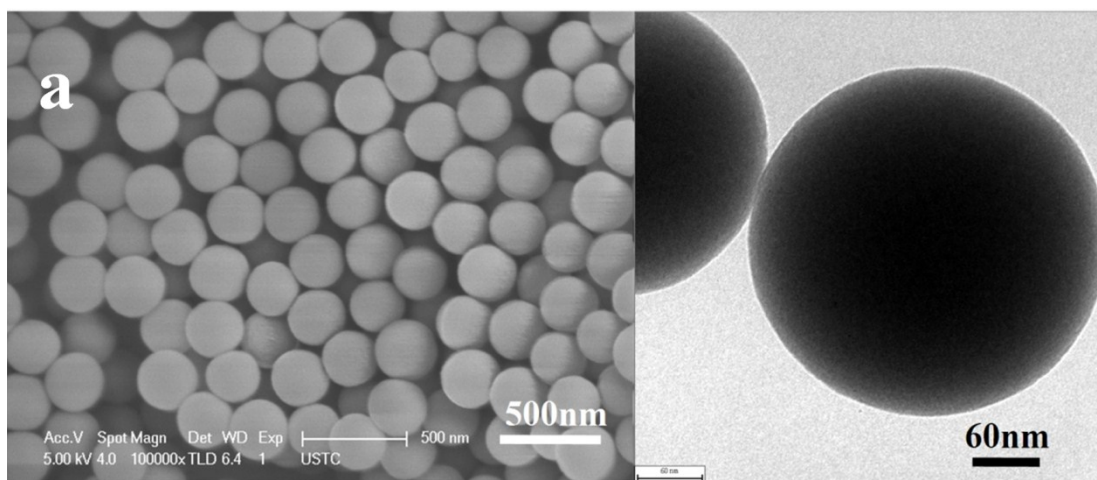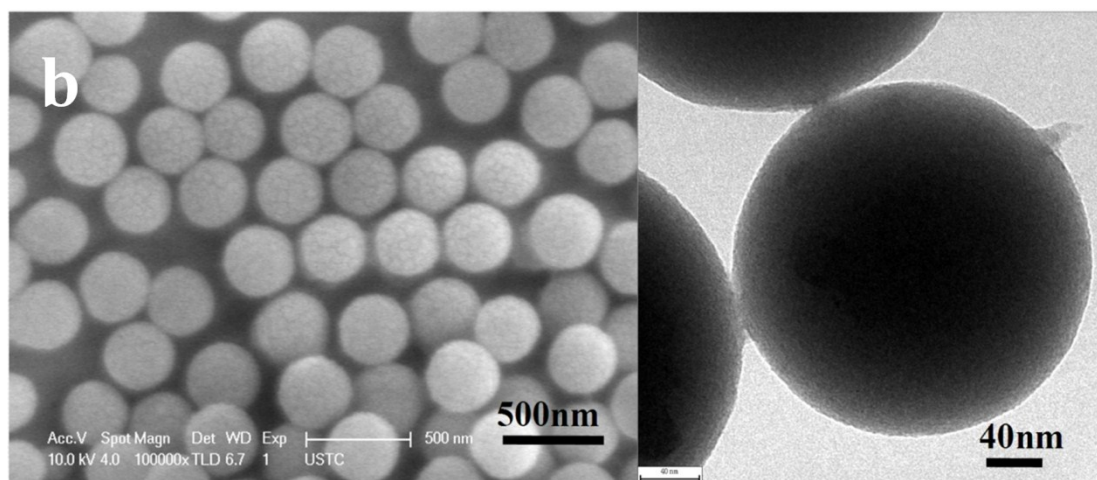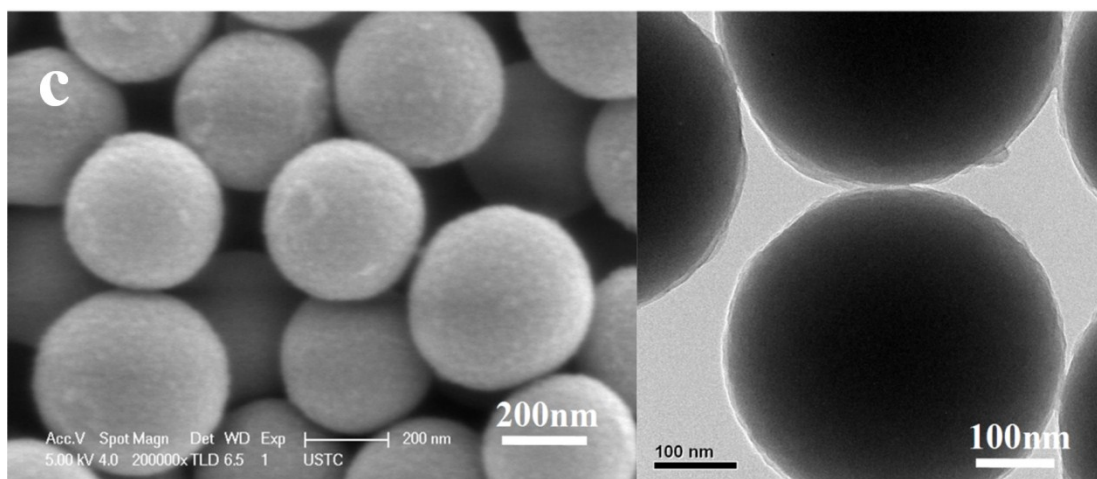

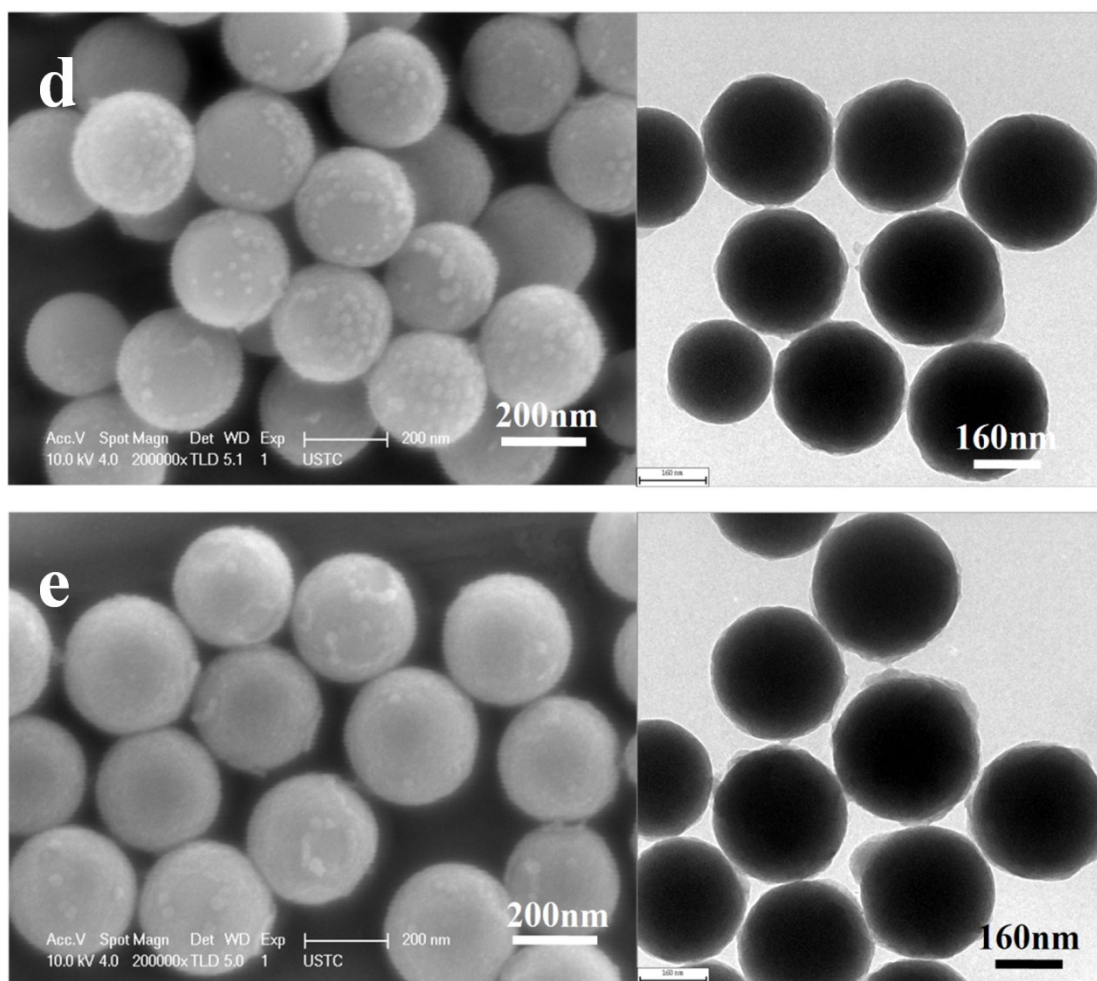

Figure S1. SEM and TEM images of the obtained raw  $\text{SiO}_2$  particles (a),  $\text{SiO}_2@\text{PDA}$  nanoparticles synthesized with different dopamine concentrations: 1g/L (b), 2g/L (c), 3g/L (d) and 4g/L (e).

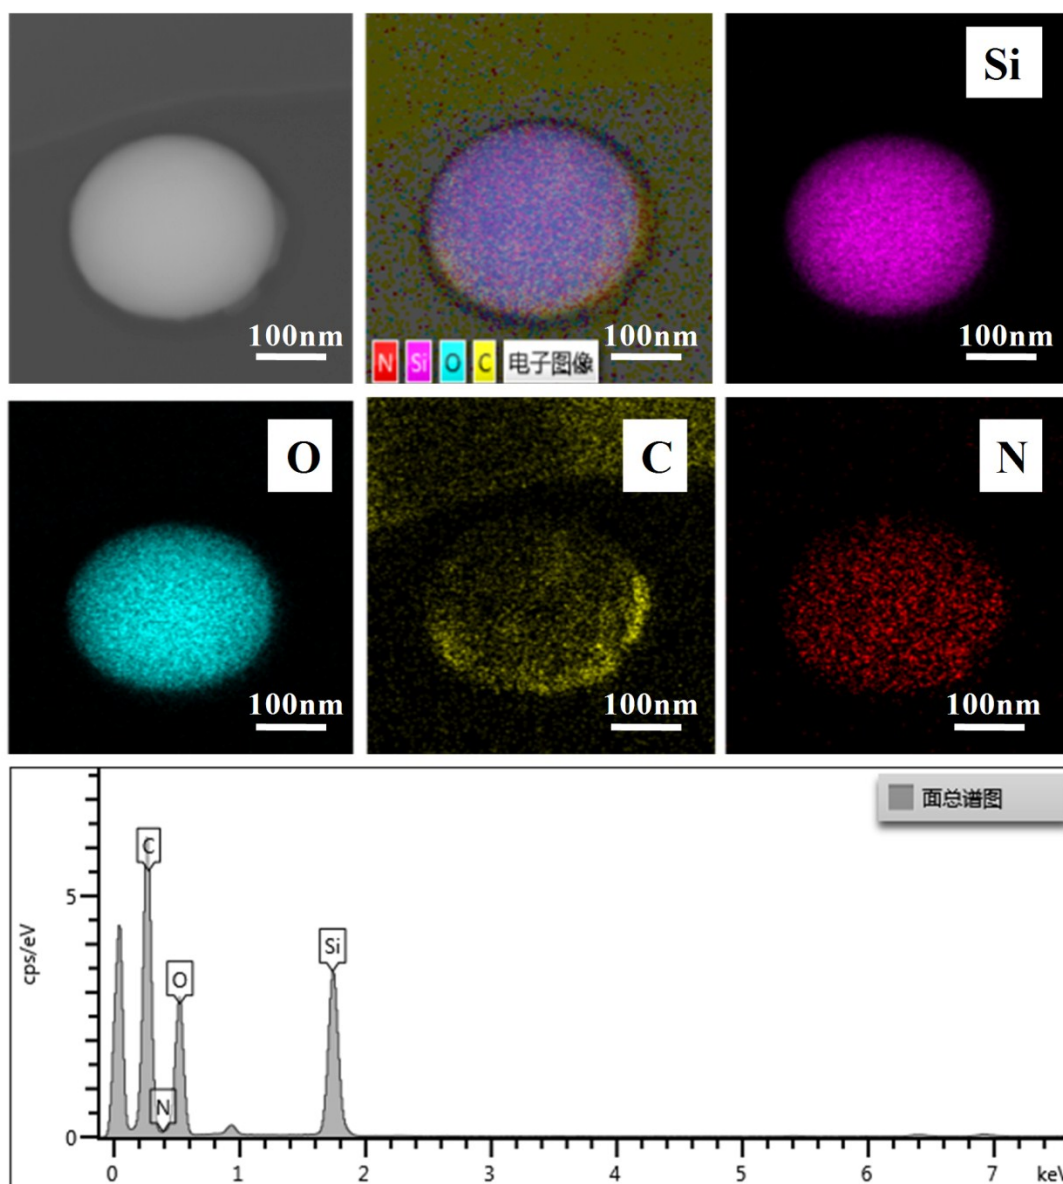

Figure S2. Energy dispersive spectrometer (EDS) mapping spectra of each element on the surface of the  $\text{SiO}_2\text{@PDA}$  core-shell nanoparticles and the element content distributions are shown in table.

From figure S2 we can clearly see the element of carbon and nitrogen on the

surface of core-shell nanoparticles. Carbon and nitrogen is the characteristic element of polydopamine. The element content of carbon, nitrogen, oxygen and silicon is 61.37, 0.07, 22.13, 16.43wt%. These indicate that the layer of polydopamine was encapsulated on the surface of SiO<sub>2</sub>.
